# Supplementary material for: Limitations of athlete-exposures as a construct for comparisons of injury rates by gender/sex: a narrative review
Source: HighWire-hosted journal article supplement (doi:10.1136/bjsports-2024-108812), 2024-12-04
Supplement: bjsports-2024-108812supp001_data_supplement.pdf [file bjsports-2024-108812supp001_data_supplement.pdf]

- Game participant
- Non-participant
- ACL injury

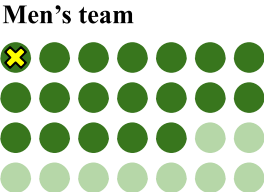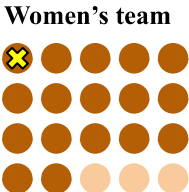

|                                           | Men                                       | Women                                     |
|-------------------------------------------|-------------------------------------------|-------------------------------------------|
| Exposure measures                         |                                           |                                           |
| Roster size-based AEs                     | 28 players × 1 game<br>= 28               | 25 players × 1 game<br>= 25               |
| Participant-based AEs                     | 19 participants × 1 game<br>= 19          | 17 participants × 1 game<br>= 17          |
| Player-hours                              | 6 participants × 1 hour game<br>= 6       | 6 participants × 1 hour game<br>= 6       |
| Injury rate and risk measures             |                                           |                                           |
| Injury rate per 100 roster-based AEs      | 1 injury ÷ 28 AEs × 100<br>= 3.6          | 1 injury ÷ 25 AEs × 100<br>= 4.0          |
| Injury rate per 100 participant-based AEs | 1 injury ÷ 19 AEs × 100<br>= 5.3          | 1 injury ÷ 17 AEs × 100<br>= 5.9          |
| Injury rate per 100 player-hours          | 1 injury ÷ 6 player-hours × 100<br>= 16.7 | 1 injury ÷ 6 player-hours × 100<br>= 16.7 |
| Injury risk per team member               | 1 injury ÷ 28 players<br>= 0.036          | 1 injury ÷ 25 players<br>= 0.040          |
| Injury risk per participant               | 1 injury ÷ 19 participants<br>= 0.053     | 1 injury ÷ 17 participants<br>= 0.059     |
